# Supplementary material for: Phosphorus/nitrogen co-doped and bimetallic MOF-derived cathode for all-solid-state rechargeable zinc–air batteries
Source: Royal Society of Chemistry journal article supplement (doi:10.1039/d0ra04827e), 2020-01-01
Supplement: d0ra04827e1.pdf [file d0ra04827e1.pdf]

## Supplementary Information

### Phosphorus/Nitrogen Co-Doped and Bimetallic MOFs-Derived Cathode for All-Solid-State Rechargeable Zinc-Air Battery

Xing Yang,<sup>a1</sup> Xianghua Wu,<sup>a1</sup> Zeping Guo,<sup>a</sup> Qingyu Li,<sup>be</sup> Hongqiang Wang,<sup>\*be</sup> Chujun Ke,<sup>a</sup> Wei Zeng,<sup>a</sup> Xiafei Qiu,<sup>a</sup> Yun He,<sup>\*ae</sup> Xiaoguang Liang,<sup>\*abd</sup> and Yoonseob Kim<sup>c</sup>

<sup>a</sup>Department of Physics, Guangxi Normal University, Guilin, China

<sup>b</sup>Guangxi Key Laboratory of Low Carbon Energy Materials, Guangxi Normal University, Guilin, China

<sup>c</sup>Department of Chemical and Biological Engineering, Hong Kong University of Science and Technology, Clear Water Bay, Kowloon, Hong Kong SAR, China

<sup>d</sup>Guangxi Key Laboratory of Nuclear Physics and Technology, Guangxi Normal University, Guilin, China

<sup>e</sup>State Key Laboratory for Chemistry and Molecular Engineering of Medicinal Resources, Guangxi Normal University, Guilin, China

\*Corresponding authors.

Email: [lxg8521@mailbox.gxnu.edu.cn](mailto:lxg8521@mailbox.gxnu.edu.cn) (X.G. Liang), [hy@gxnu.edu.cn](mailto:hy@gxnu.edu.cn) (Y. He),

[whq74@gxnu.edu.cn](mailto:whq74@gxnu.edu.cn) (H.Q. Wang)

<sup>1</sup>These authors contributed equally to this work.

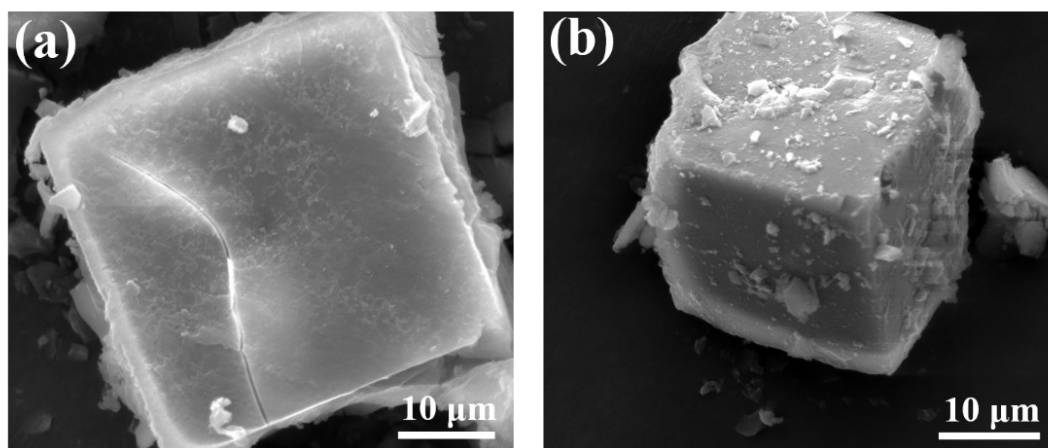

**Fig. S1.** SEM images of FeNi-MOFs. (a) Top view and (b) Side view.

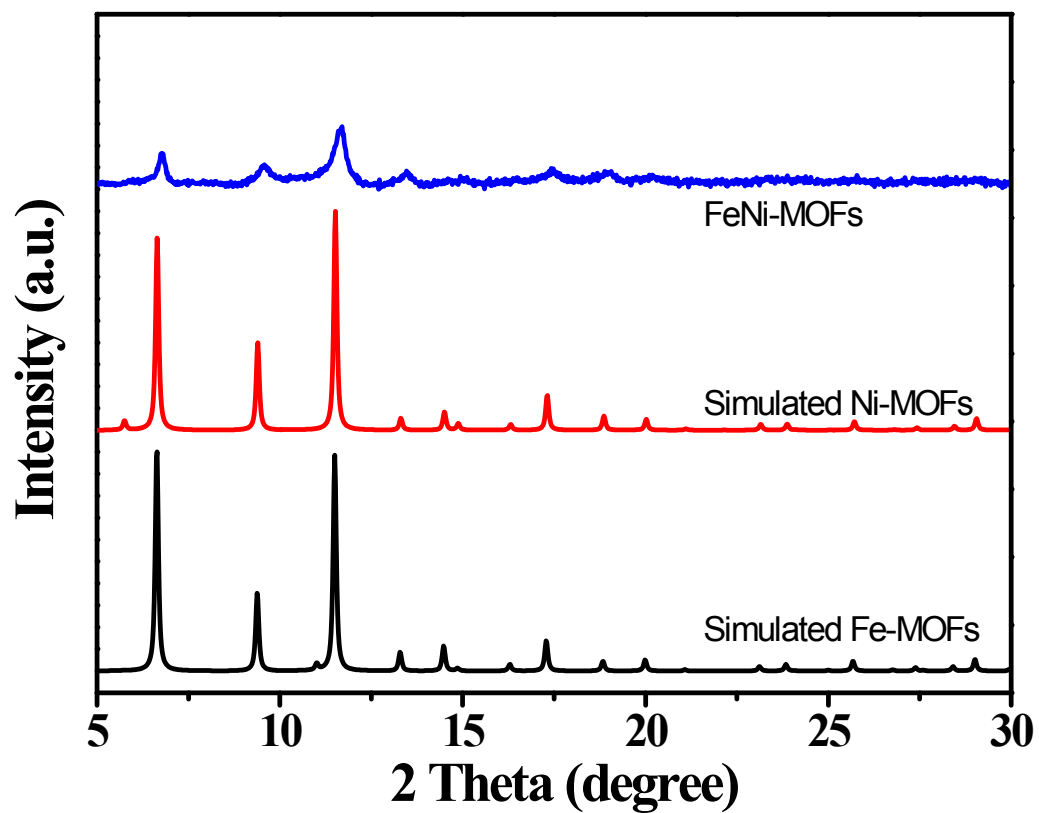

**Fig. S2.** The XRD pattern of FeNi-MOFs.

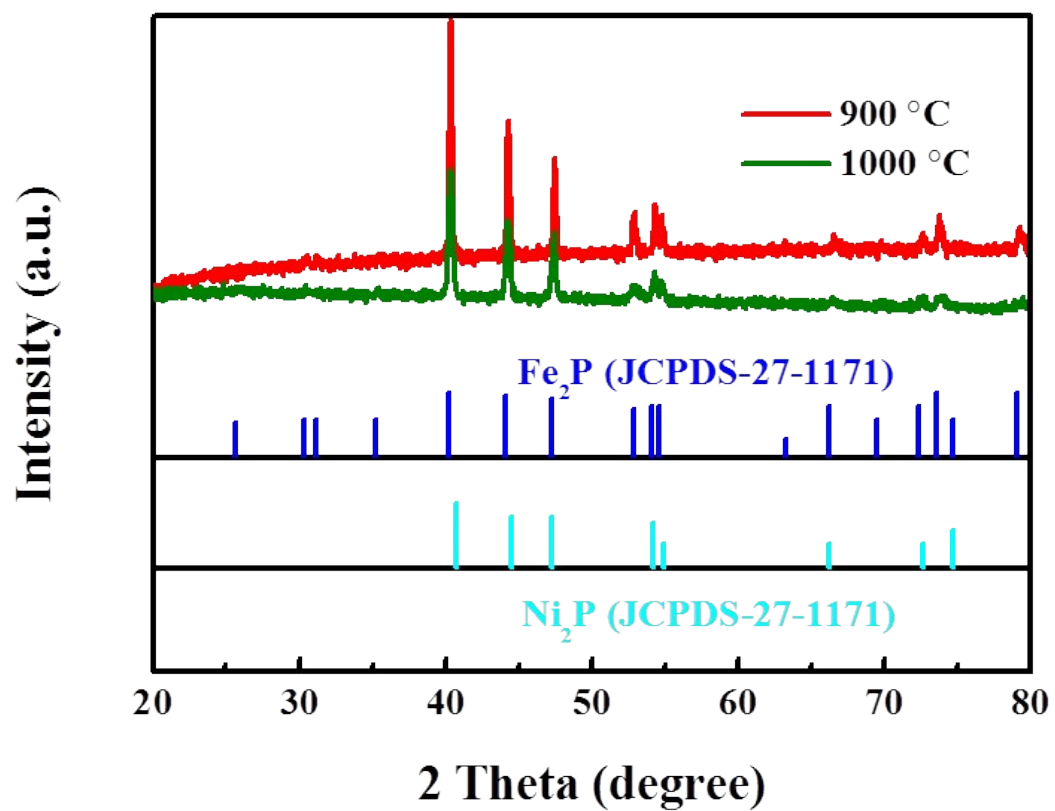

Fig. S3. The XRD patterns of P-FeNi/NC@G synthesized at different temperature.

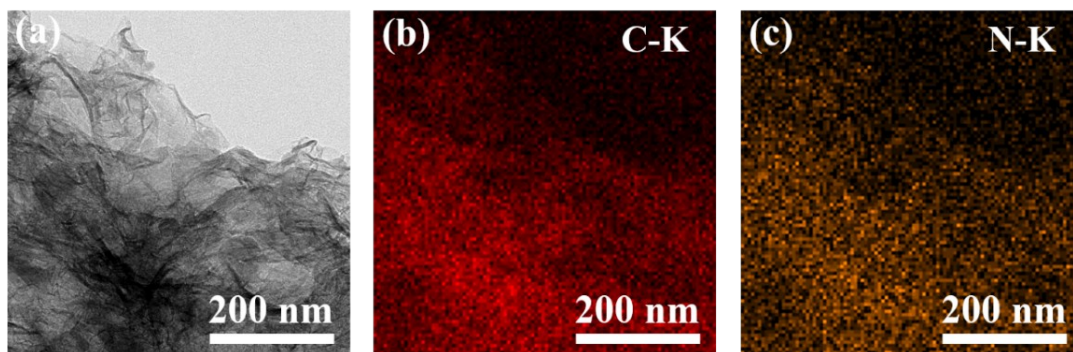

**Fig. S4.** TEM image and the corresponding EDS elemental mapping images of C, N elements.

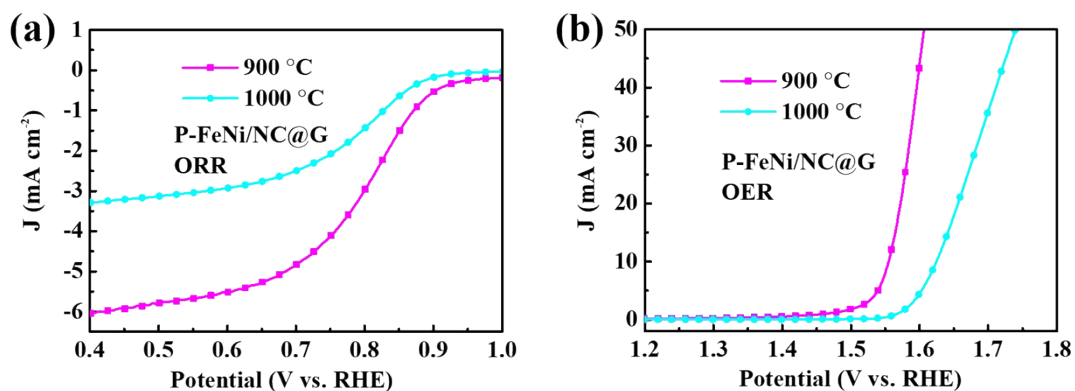

**Fig. S5.** (a) ORR and (b) OER polarization curves tested in O<sub>2</sub>-saturated 0.1 M KOH at 1600 rpm. The P-FeNi/NC@G catalysts are synthesized at different pyrolysis temperature of 900 °C and 1000 °C in argon atmosphere.

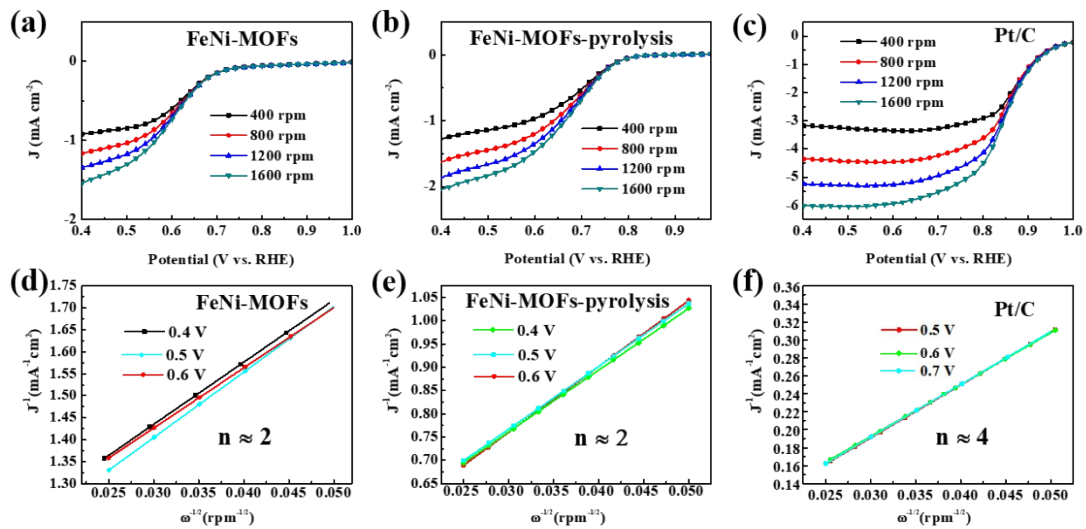

**Fig. S6.** ORR polarization curves of (a) FeNi-MOFs, (b) FeNi-MOFs-pyrolysis and (c) commercial Pt/C tested in O<sub>2</sub>-saturated 0.1 M KOH at different Rotation speeds. (d)-(f) The corresponding K-L plots at different potentials and the calculated electron transfer number per oxygen molecule ( $n$ ).



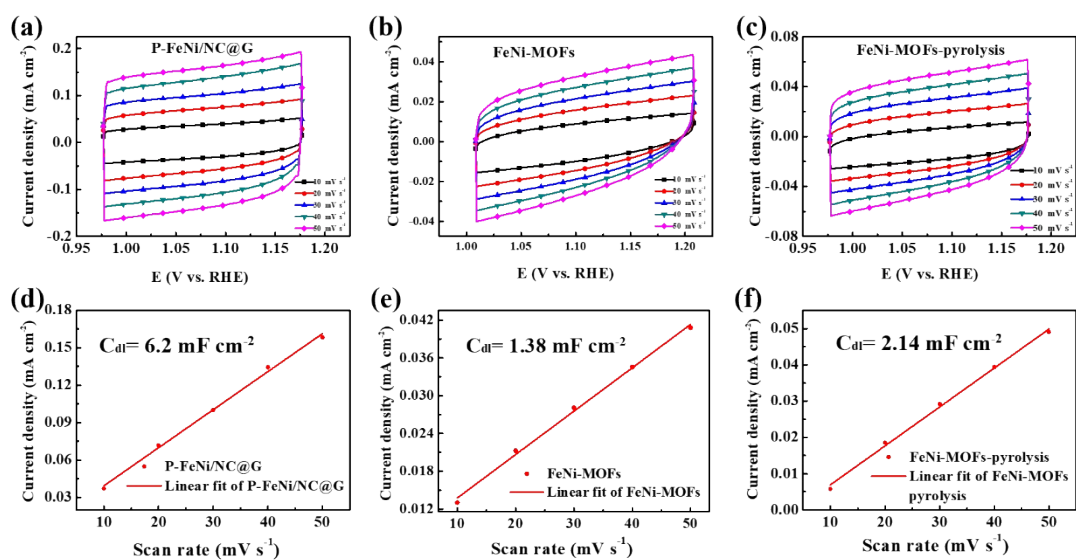

**Fig. S7.** CV curves in the range of 0-0.2 V at scan rates from 10 to 50 mV s<sup>-1</sup> and corresponding current density-scan rates curves. (a) and (d) for P-FeNi/NC@G, (b) and (e) for FeNi-MOFs, (c) and (f) for FeNi-MOFs-pyrolysis.

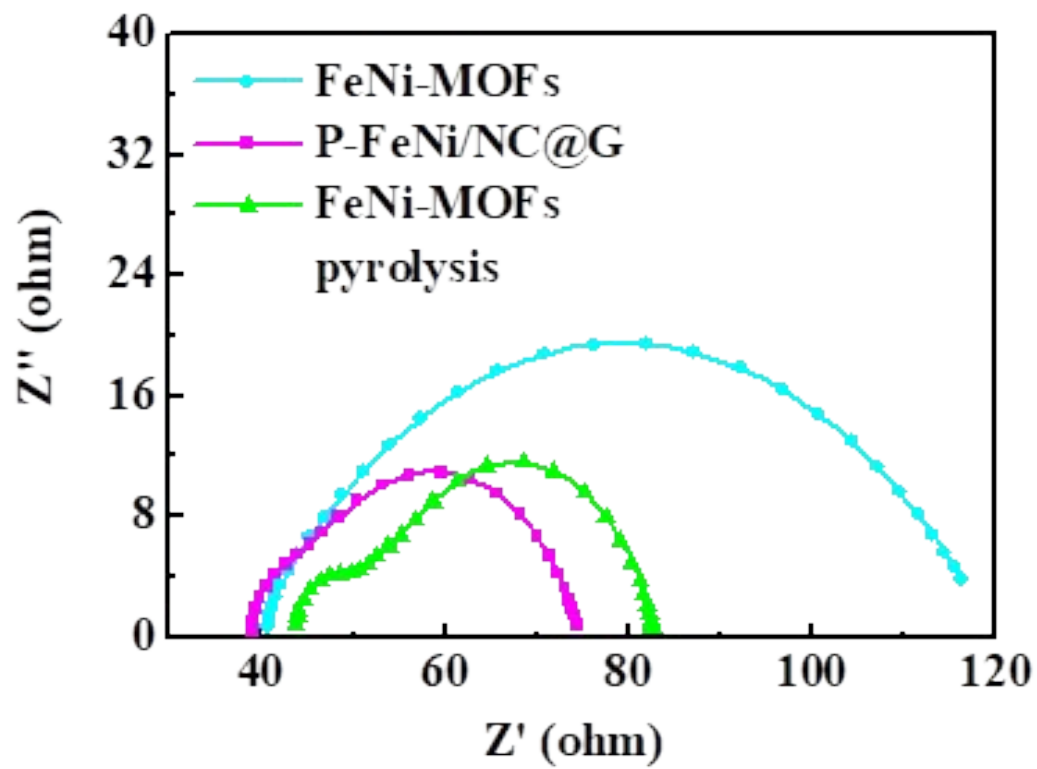

**Fig. S8.** Nyquist plots of FeNi-MOFs, FeNi-MOFs-pyrolysis, and P-FeNi/C@G catalysts.

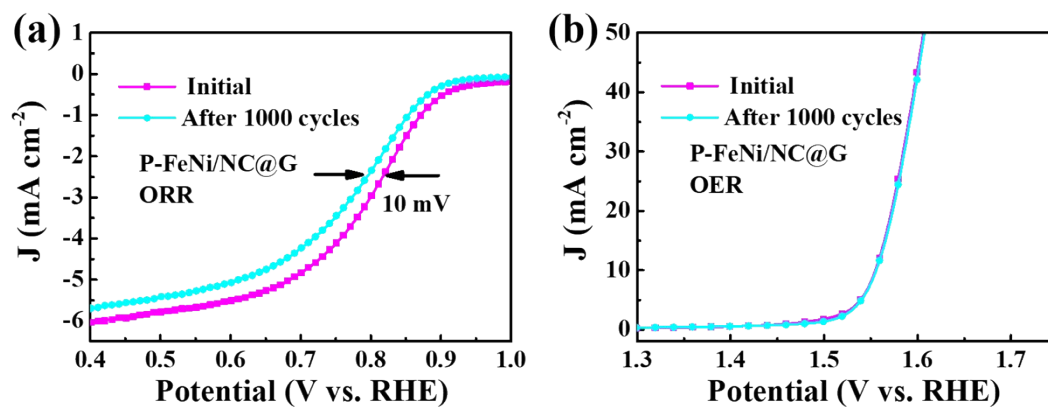

**Fig. S9.** The (a) ORR and (b) OER LSV curves of P-FeNi/NC@G catalyst recorded before and after 1000 CV cycles.

**Table S1.** The  $\Delta E$  value of different catalysts.<sup>#</sup>

| Catalysts           | $E_{1/2}$ (V) | $E_{j=10}$ (V) | $\Delta E$ (V) |
|---------------------|---------------|----------------|----------------|
| FeNi-MOFs           | 0.64          | 1.65           | 1.01           |
| FeNi-MOFs-pyrolysis | 0.71          | 1.60           | 0.89           |
| Pt/C                | 0.84          | 1.86           | 1.02           |
| RuO <sub>2</sub>    | 0.60          | 1.56           | 0.96           |

<sup>#</sup> $E_{1/2}$  is the half over-potential of ORR,  $E_{j=10}$  is the potential of OER at a current density of 10 mA cm<sup>-2</sup>,  $\Delta E$  is the potential difference between  $E_{j=10}$  and  $E_{1/2}$ .

**Table S2.** List of properties of recently reported all-solid-state ZABs based on other cathodic catalysts.

| Catalysts                                                 | $E_{1/2}$ (V) | $E_{j=10}$ (V)   | $\Delta E$ (V) | Power density<br>(mW cm <sup>-2</sup> ) | Reference        |
|-----------------------------------------------------------|---------------|------------------|----------------|-----------------------------------------|------------------|
| P-FeNi/NC@G                                               | 0.81          | 1.54             | 0.73           | 159                                     | <b>This work</b> |
| Co <sub>2</sub> P@CNF                                     | 0.803         | 1.691            | 0.88           | 121                                     | S1               |
| CoNi-MOF/RGO                                              | 0.718         | 1.548            | 0.83           | 97                                      | S2               |
| Hybrid nanosheets                                         | 0.79          | 1.72             | 0.93           | —                                       | S3               |
| FeN <sub>x</sub> -PNC                                     | 0.86          | 1.635            | 0.775          | 118                                     | S4               |
| Fe-CoN <sub>4</sub> @NC                                   | 0.83          | 1.62             | 0.79           | 105                                     | S5               |
| FeNi@NCNTs/CC                                             | 0.77          | 1.48<br>(1M KOH) | 0.71           | —                                       | S6               |
| Co <sub>3</sub> O <sub>4-x</sub> HoNPs@HPNCS-60           | 0.83          | 1.57             | 0.74           | 94.1                                    | S7               |
| NiCo/PFC                                                  | 0.79          | 1.63             | 0.84           | —                                       | S8               |
| N-GCNT/FeCo <sub>3</sub>                                  | 0.92          | 1.73             | 0.81           | 97.6                                    | S9               |
| EA-Ni-900                                                 | 0.78          | 1.55             | 0.77           | 65                                      | S10              |
| CC-AC                                                     | 0.72          | 1.59             | 0.87           | 52.3                                    | S11              |
| FeNi-LDH@3DG/CNTS                                         | 0.71          | 1.61             | 0.9            | —                                       | S12              |
| Fe-Ni <sub>2</sub> P@N, P-CNS                             | 0.75          | 1.62             | 0.87           | —                                       | S13              |
| N-CoSe <sub>2</sub> /3D Ti <sub>3</sub> C <sub>2</sub> TX | 0.79          | 1.54             | 0.75           | 142                                     | S14              |
| FeNi-NC                                                   | 0.83          | 1.61             | 0.78           | 80.8                                    | S15              |
| NiFe/N-CNT                                                | 0.75          | 1.52             | 0.77           | 105.4                                   | S16              |

## Reference

- [S1] J. Gao, J. Wang, L. Zhou, X. Cai, D. Zhan, M. Hou, L. Lai, Co<sub>2</sub>P@N,P-codoped carbon nanofiber as a free-standing air electrode for Zn-air batteries: synergy effects of CoN<sub>x</sub> satellite shells, *ACS Appl. Mater. Interfaces* 11 (2019) 10364–10372.
- [S2] X. Zheng, Y. Cao, D. Liu, M. Cai, J. Ding, X. Liu, J. Wang, W. Hu, C. Zhong, Bimetallic metal-organic-framework/reduced graphene oxide composites as bifunctional electrocatalysts for rechargeable Zn-air batteries, *ACS Appl. Mater. Interfaces* 11 (2019) 15662–15669.
- [S3] Y. Li, C. Zhong, J. Liu, X. Zeng, S. Qu, X. Han, Y. Deng, W. Hu, J. Lu, Atomically thin mesoporous Co<sub>3</sub>O<sub>4</sub> layers strongly coupled with N-rGO nanosheets as high-performance bifunctional catalysts for 1D knittable zinc-air batteries, *Adv Mater.* 30 (2018) 1703657.
- [S4] L. Ma, S. Chen, Z. Pei, Y. Huang, G. Liang, F. Mo, Q. Yang, J. Su, Y. Gao, J.A. Zapien, C. Zhi, Single-site active iron-based bifunctional oxygen catalyst for a compressible and rechargeable zinc-air battery, *ACS Nano* 12 (2018) 1949–1958.
- [S5] Q. Jin, B. Ren, J. Chen, H. Cui, C. Wang, A facile method to conduct 3D self-supporting Co-FeCo/N-Doped graphene-like carbon bifunctional electrocatalysts for flexible solid-state zinc air battery, *Appl. Catal., B* 256 (2019) 117887.
- [S6] X. Zhao, S.C. Abbas, Y. Huang, J. Lv, M. Wu, Y. Wang, Robust and highly active FeNi@NCNT nanowire arrays as integrated air electrode for flexible solid-state rechargeable Zn-air batteries, *Adv. Mater. Interfaces* 5 (2018) 1701448.
- [S7] D. Ji, L. Fan, L. Tao, Y. Sun, M. Li, G. Yang, T.Q. Tran, S. Ramakrishna, S. Guo, The Kirkendall Effect for engineering oxygen vacancy of hollow Co<sub>3</sub>O<sub>4</sub> nanoparticles toward high-performance portable zinc-air batteries, *Angew. Chem., Int. Ed.* 58 (2019) 13840–13844.
- [S8] G. Fu, Y. Chen, Z. Cui, Y. Li, W. Zhou, S. Xin, Y. Tang, J.B. Goodenough, Novel hydrogel-derived bifunctional oxygen electrocatalyst for rechargeable air cathodes, *Nano Lett* 16 (2016) 6516–6522.
- [S9] C. Su, H. Cheng, W. Li, Z.Liu, N. Li, Z. Hou, F. Q. Bai, H. Zhang, T. Ma, Atomic modulation of FeCo-nitrogen-carbon bifunctional oxygen electrodes for rechargeable and flexible all-solid-state zinc-air battery, *Adv. Energy Mater.* 7 (2017) 1602420.
- [S10] J. Zhao, R. Qin, R. Liu, Urea-bridging synthesis of nitrogen-doped carbon tube supported single metallic atoms as bifunctional oxygen electrocatalyst for zinc-air battery, *Appl. Catal., B* 256 (2019) 117778.

- [S11] K. Kordek, L. Jiang, K. Fan, Z. Zhu, L. Xu, M. Al-Mamun, Y. Dou, S. Chen, P. Liu, H. Yin, P. Rutkowski, H. Zhao, Two-step activated carbon cloth with oxygen-rich functional groups as a high-performance additive-free air electrode for flexible zinc-air batteries, *Adv. Energy Mater.* 9 (2019) 1802936.
- [S12] Y. Li, M. Zhao, Y. Zhao, L. Song, Z. Zhang, FeNi layered double-hydroxide nanosheets on a 3D carbon network as an efficient electrocatalyst for the oxygen evolution reaction, *Part. Part. Syst. Character.* 33 (2016) 158–166.
- [S13] Y. Xiao, S. Deng, M. Li, Q. Zhou, L. Xu, H. Zhang, D. Sun, Y. Tang, Immobilization of Fe-doped Ni<sub>2</sub>P particles within biomass agarose-derived porous N,P-carbon nanosheets for efficient bifunctional oxygen electrocatalysis, *Front. Chem.* 7 (2019) 523.
- [S14] Z. Zeng, G. Fu, H.B. Yang, Y. Yan, J. Chen, Z. Yu, J. Gao, L.Y. Gan, B. Liu, P. Chen, Bifunctional N-CoSe<sub>2</sub>/3D-MXene as highly efficient and durable cathode for rechargeable Zn–air battery, *ACS Materials Lett.* 1 (2019) 432–439.
- [S15] L. Yang, X. Zeng, D. Wang, D. Cao, Biomass-derived FeNi alloy and nitrogen-codoped porous carbons as highly efficient oxygen reduction and evolution bifunctional electrocatalysts for rechargeable Zn-air battery, *Energy Storage Mater* 12 (2018) 277–283.
- [S16] H. Lei, Z. Wang, F. Yang, X. Huang, J. Liu, Y. Liang, J. Xie, M.S. Javed, X. Lu, S. Tan, W. Mai, NiFe nanoparticles embedded N-doped carbon nanotubes as high-efficient electrocatalysts for wearable solid-state Zn-air batteries, *Nano Energy* 68 (2020) 104293.
